# Supplementary material for: Selection of a highly invasive neuroblastoma cell population through long-term human cytomegalovirus infection
Source: PubMed Central journal article supplement — Oncogenesis. 2012 Apr 30;1(4):e10–. doi: 10.1038/oncsis.2012.10 (PMC3412641; doi:10.1038/oncsis.2012.10), 2012-04-30
Supplement: oncsis201210x1.pdf [file oncsis201210x1.pdf]

## Suppl. Figure 1

**A**

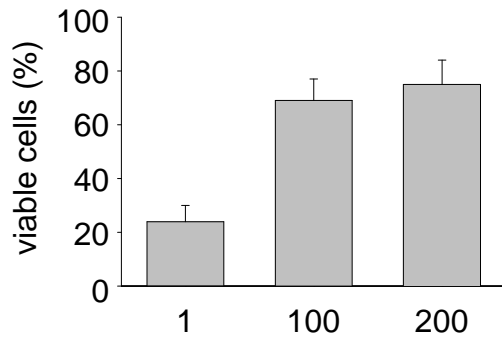

**Suppl. Figure 1.** Viable cells in UKF-NB-4<sup>Hi</sup> cell cultures. UKF-NB-4 cells were one-time infected with HCMV strain Hi at MOI 10 and then sub-cultured without further addition of virus (UKF-NB-4<sup>Hi</sup>). Fractions of viable cells were indicated by trypan blue staining at passage 1, 100 or 200.
