# Supplementary material for: Selection of a highly invasive neuroblastoma cell population through long-term human cytomegalovirus infection
Source: PubMed Central journal article supplement — Oncogenesis. 2012 Apr 30;1(4):e10–. doi: 10.1038/oncsis.2012.10 (PMC3412641; doi:10.1038/oncsis.2012.10), 2012-04-30
Supplement: oncsis201210x2.pdf [file oncsis201210x2.pdf]

## Suppl. Figure 2

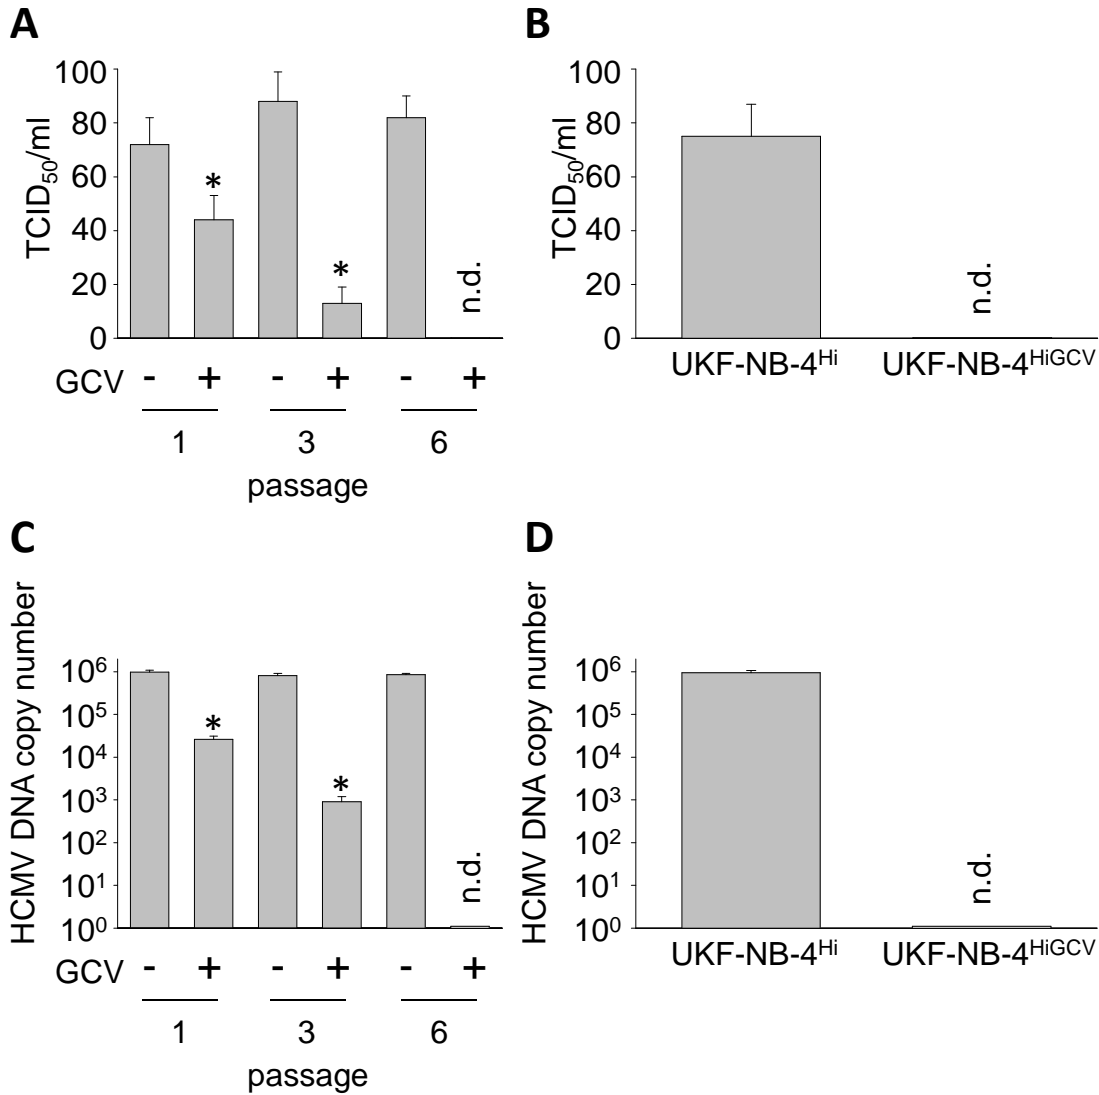

**Suppl. Figure 2.** Establishment of UKF-NB-4<sup>HiGCV</sup> cells. UKF-NB-4<sup>Hi</sup> cells were treated for 6 passages with ganciclovir 20 $\mu$ M (GCV). A) HCMV virus titres in GCV-treated UKF-NB-4<sup>Hi</sup> cells at different passages in comparison to non-treated UKF-NB-4<sup>Hi</sup> cells. \* P < 0.05 relative to non-treated UKF-NB-4<sup>Hi</sup> cells B) HCMV virus titres in GCV-cured UKF-NB-4<sup>Hi</sup> (UKF-NB-4<sup>HiGCV</sup>) cells after cultivation for 10 passages in the absence of GCV in comparison to non-treated UKF-NB-4<sup>Hi</sup> cells. n.d. = not detectable C) HCMV DNA copy numbers as indicated by quantitative PCR in GCV-treated UKF-NB-4<sup>Hi</sup> cells at different passages in comparison to non-treated UKF-NB-4<sup>Hi</sup> cells. \* P < 0.05 relative to non-treated UKF-NB-4<sup>Hi</sup> cells D) HCMV DNA copy numbers in UKF-NB-4<sup>HiGCV</sup> cells after cultivation for 10 passages in the absence of GCV in comparison to non-treated UKF-NB-4<sup>Hi</sup> cells. n.d. = not detectable
