# Supplementary material for: Selection of a highly invasive neuroblastoma cell population through long-term human cytomegalovirus infection
Source: PubMed Central journal article supplement — Oncogenesis. 2012 Apr 30;1(4):e10–. doi: 10.1038/oncsis.2012.10 (PMC3412641; doi:10.1038/oncsis.2012.10), 2012-04-30
Supplement: oncsis201210x3.pdf [file oncsis201210x3.pdf]

### Suppl. Figure 3

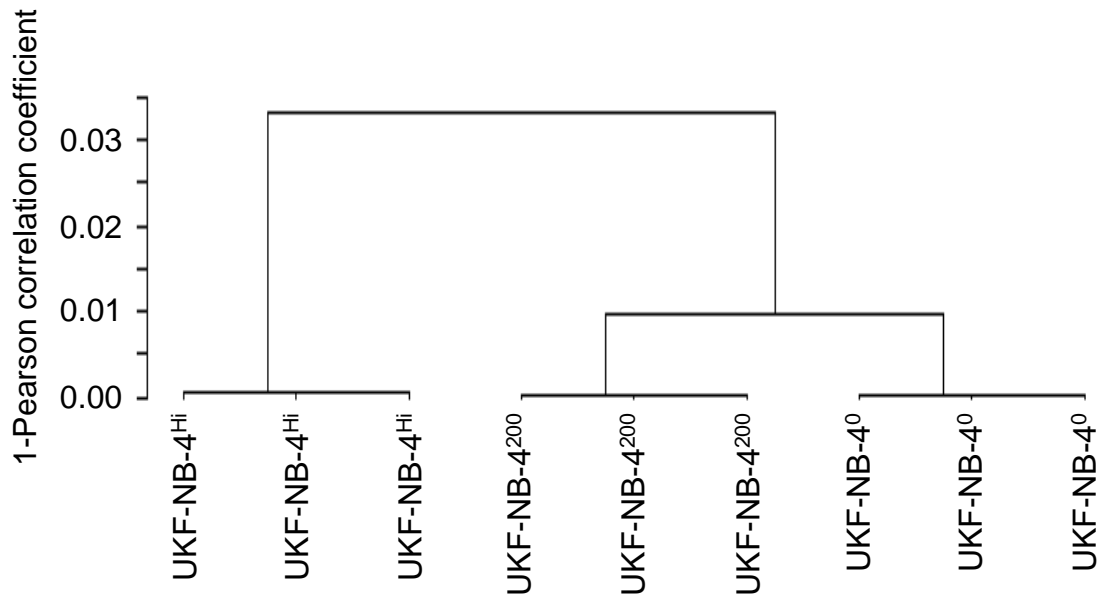

**Suppl. Figure 3.** Comparison of global gene expression in UKF-NB-4 cells stored in parallel to primary HCMV infection (UKF-NB-4<sup>0</sup>), UKF-NB-4 cells cultivated in parallel to the chronically HCMV-infected UKF-NB-4 cells (UKF-NB-4<sup>200</sup>), and chronically HCMV-infected UKF-NB-4 cells (UKF-NB-4<sup>Hi</sup>) by gene microarray. Hierarchical cluster analysis based on the Pearson correlation coefficient.
