# Supplementary material for: Selection of a highly invasive neuroblastoma cell population through long-term human cytomegalovirus infection
Source: PubMed Central journal article supplement — Oncogenesis. 2012 Apr 30;1(4):e10–. doi: 10.1038/oncsis.2012.10 (PMC3412641; doi:10.1038/oncsis.2012.10), 2012-04-30
Supplement: oncsis201210x6.pdf [file oncsis201210x6.pdf]

**Suppl. Table 1.** Numbers of significantly differentially expressed genes at the mRNA level (FDR < 0.05, corrected for multiple testing) between UKF-NB-4, UKF-NB-4<sup>Hi</sup>, and UKF-NB-4<sup>HiGCV</sup> cells as determined by gene microarray analysis.

| Cell line comparison                                 | Significantly differentially expressed genes |
|------------------------------------------------------|----------------------------------------------|
| UKF-NB-4 <sup>Hi</sup> vs. UKF-NB-4                  | 8832                                         |
| UKF-NB-4 <sup>HiGCV</sup> vs. UKF-NB-4               | 8873                                         |
| UKF-NB-4 <sup>Hi</sup> vs. UKF-NB-4 <sup>HiGCV</sup> | 326                                          |
